# Supplementary material for: Red, green, and blue light-emitting carbon dots prepared from o-phenylenediamine
Source: Royal Society of Chemistry journal article supplement (doi:10.1039/d1ra02298a), 2021-01-01
Supplement: d1ra02298a1.pdf [file d1ra02298a1.pdf]

## Supporting Information

### **Red, Green, and Blue Light-Emitting Carbon Dots Prepared from *o*-phenylenediamine**

Yulong An<sup>a</sup>, Xu Lin<sup>a\*</sup>, Yuxi Zhou<sup>a</sup>, Yan Li<sup>a</sup>, Yunwu Zheng<sup>b</sup>, Chunhua Wu<sup>b</sup>, Kaimeng Xu<sup>b</sup>,  
Xijuan Chai<sup>b</sup>, Can Liu<sup>a,b\*</sup>

<sup>a</sup>Key Laboratory for Forest Resources Conservation and Utilization in the Southwest Mountains of China; Southwest Forestry University, Kunming, China

<sup>b</sup>Key Laboratory of State Forestry Administration for Highly-Efficient Utilization of Forestry Biomass Resources in Southwest China; Southwest Forestry University, Kunming, China

E-mail: [liucanswfu@163.com](mailto:liucanswfu@163.com)

Supporting Figures

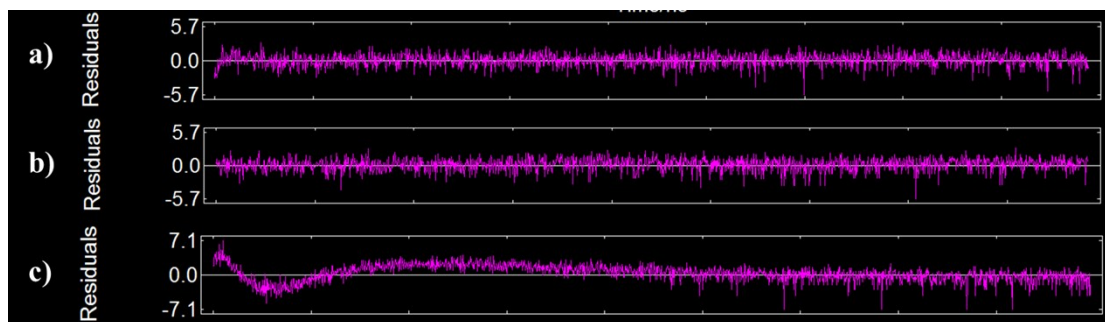

**Fig. S1** a-c) Error bar in the photoluminescence lifetime decay of a) R-CDs, b) G-CDs, and c) B-CDs in ethanol ( $c = 0.1 \text{ mg / mL}$ ;  $\lambda_{\text{ex}} = 500 \text{ nm}$  for R-CD;  $\lambda_{\text{ex}} = 400 \text{ nm}$  for G-CD;  $\lambda_{\text{ex}} = 340 \text{ nm}$  for B-CD).

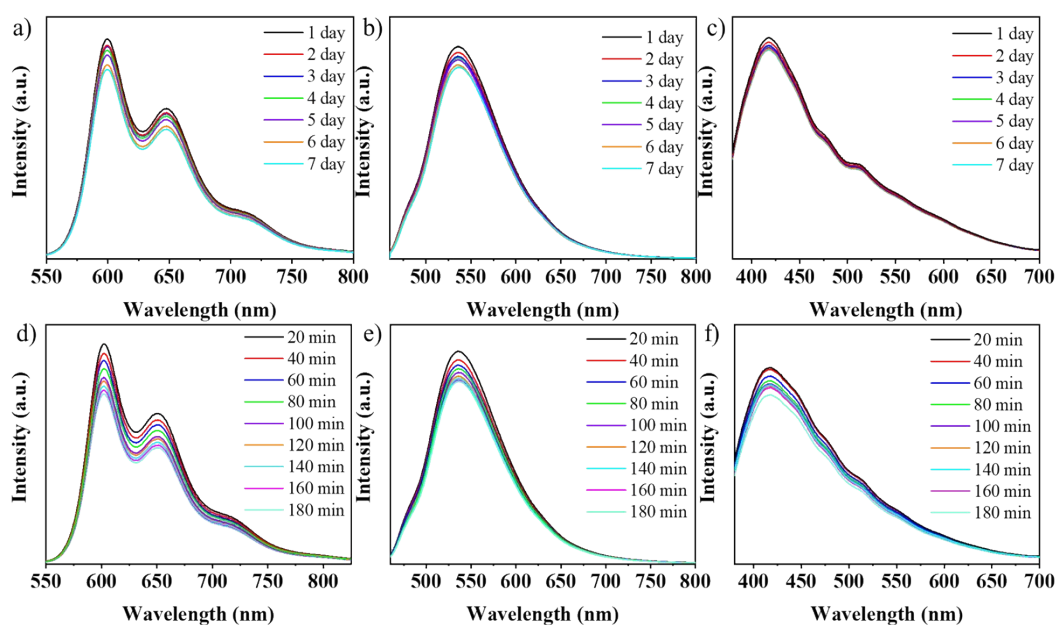

**Fig. S2** a-c) The PL spectra of the a) R-CDs, b) G-CDs, c) B-CDs under visible light for 7 days; d-f). The PL spectra of the d) R-CDs, e) G-CDs, f) B-CDs under a UV lamp for 180 min.

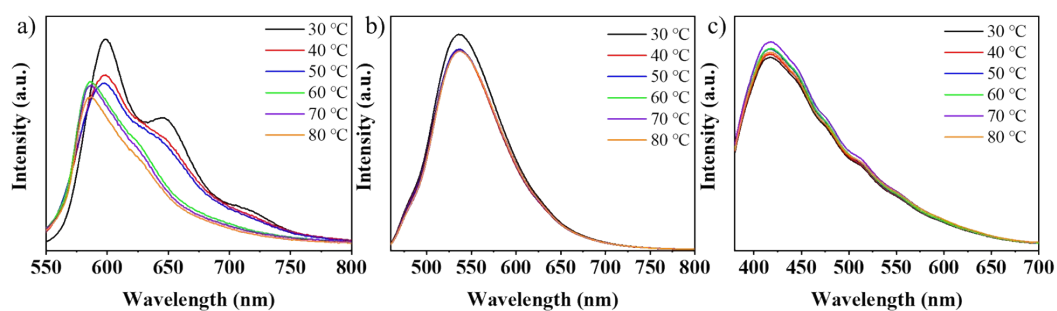

**Fig. S3** The PL spectra of the a) R-CDs, b) G-CDs, c) B-CDs at different temperatures.

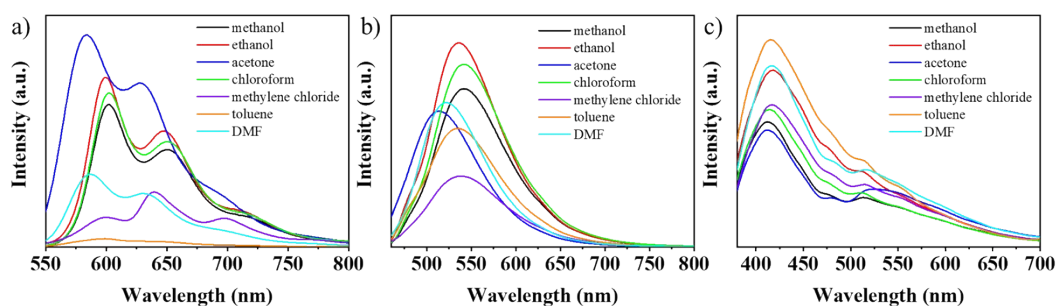

**Fig. S4** The PL spectra of the a) R-CDs, b) G-CDs, c) B-CDs at different polar solvents.

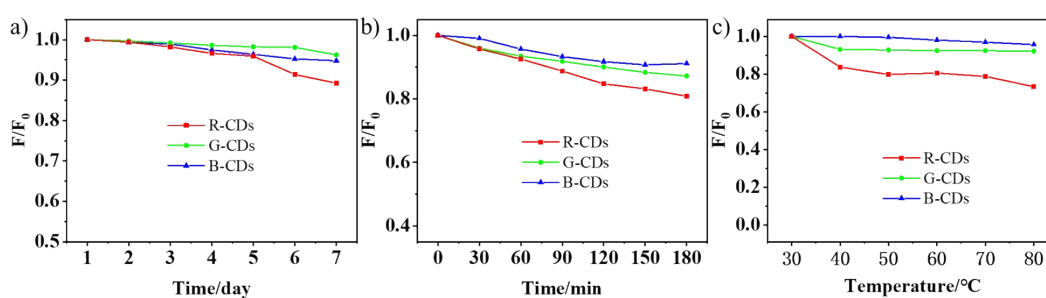

**Fig. S5** a-b) Decay curve of FL intensity of R-CDs, G-CDs and B-CDs with increasing a) visible and b) UV irradiation time. c) Decay curve of FL intensity of R-CDs, G-CDs and B-CDs with increasing temperature (initial temperature 30 °C).

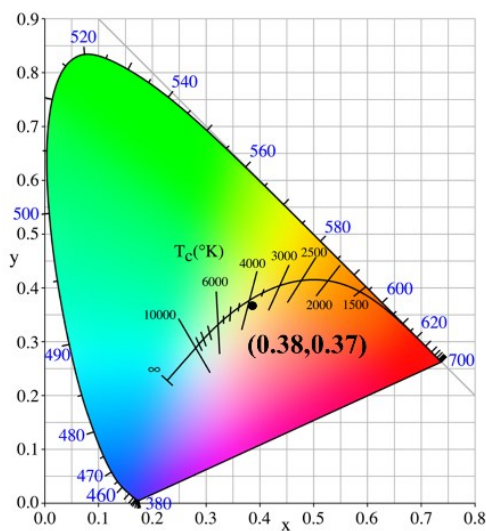

**Fig. S6** CIE chromaticity coordinates of white fluorescent carbon dots excited at 365 nm.
